# Supplementary material for: Hidradenitis Suppurativa (HS) prevalence, demographics and management pathways in Australia: A population-based cross-sectional study
Source: PubMed Central journal article supplement (PMC6057625; doi:10.1371/journal.pone.0200683), 2018-07-24
Supplement: pone.0200683.s001.pdf [file pone.0200683.s001.pdf]

**S1 Table. HS screening questionnaire supported by a visual diagram (adapted from Esmann et al (10))<sup>a,b,c</sup>.**

| Do you repeatedly have outbreaks of big sore or painful nodules or boils that heal with scars in any of these locations? (tick all that apply) |
|------------------------------------------------------------------------------------------------------------------------------------------------|
| Groin                                                                                                                                          |
| Armpits                                                                                                                                        |
| Sexual organs                                                                                                                                  |
| Anal Region                                                                                                                                    |
| Under the breasts                                                                                                                              |
| Folds on the stomach/around the navel                                                                                                          |
| Other Locations <sup>c</sup>                                                                                                                   |

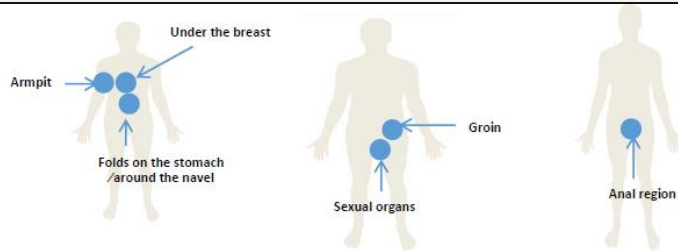

a Indirectly yes to boils: Sensitivity 0.97, Specificity 0.82, Positive Predictive Value 0.85 (10)

b In this study a diagram showing the locations listed in the table was also provided.

c The questionnaire used in this study also listed "Other Locations" but this was not used to identify possible HS patients (ie a suspected HS subject was an individual with presence of outbreaks AND at least one nodule/boil location other than "Other Locations")
