# Supplementary material for: Hidradenitis Suppurativa (HS) prevalence, demographics and management pathways in Australia: A population-based cross-sectional study
Source: PubMed Central journal article supplement (PMC6057625; doi:10.1371/journal.pone.0200683), 2018-07-24
Supplement: pone.0200683.s002.pdf [file pone.0200683.s002.pdf]

**S2 Table. Study questions included in the HS questionnaire following the HS screening questionnaire.**

| <b>Have you been diagnosed with Hidradenitis Suppurativa or <i>Acne Inversa</i>?</b> |                                                                                                 |
|--------------------------------------------------------------------------------------|-------------------------------------------------------------------------------------------------|
| <b>YES</b>                                                                           | <b>NO</b>                                                                                       |
| <p>From which clinician did you receive your diagnosis?</p>                          | <p>How many clinicians have you seen regarding your condition of boils?</p>                     |
| General practitioner                                                                 | 1                                                                                               |
| Dermatologist                                                                        | 2                                                                                               |
| Surgeon                                                                              | 3                                                                                               |
| Infectious disease specialist                                                        | 4                                                                                               |
| Gynaecologist                                                                        | 5                                                                                               |
| Emergency specialist                                                                 | More than 5                                                                                     |
| Gastroenterologist                                                                   | None                                                                                            |
| Other                                                                                |                                                                                                 |
| <p>How many clinicians did you see before you received your diagnosis?</p>           | <p>Which clinician/s have you seen regarding your condition of boils (tick all that apply)?</p> |
| 1                                                                                    | General practitioner                                                                            |
| 2                                                                                    | Dermatologist                                                                                   |
| 3                                                                                    | Surgeon                                                                                         |
| 4                                                                                    | Infectious disease specialist                                                                   |
| 5                                                                                    | Gynaecologist                                                                                   |
| More than 5                                                                          | Emergency specialist                                                                            |
|                                                                                      | Gastroenterologist                                                                              |
|                                                                                      | Other                                                                                           |
| <p>Which clinicians did you see prior to your diagnosis (tick all that apply)?</p>   | <p>Which clinicians do you currently see regarding your condition of boils?</p>                 |
| General practitioner                                                                 | General practitioner                                                                            |
| Dermatologist                                                                        | Dermatologist                                                                                   |
| Surgeon                                                                              | Surgeon                                                                                         |
| Infectious disease specialist                                                        | Infectious disease specialist                                                                   |
| Gynaecologist                                                                        | Gynaecologist                                                                                   |
| Emergency specialist                                                                 | Emergency specialist                                                                            |
| Gastroenterologist                                                                   | Gastroenterologist                                                                              |
| Other                                                                                | Other                                                                                           |
|                                                                                      | None                                                                                            |
