# Supplementary material for: Hidradenitis Suppurativa (HS) prevalence, demographics and management pathways in Australia: A population-based cross-sectional study
Source: PubMed Central journal article supplement (PMC6057625; doi:10.1371/journal.pone.0200683), 2018-07-24
Supplement: pone.0200683.s003.pdf [file pone.0200683.s003.pdf]

**S3 Table. Past and Current Treatments for HS in patients enrolled in the HS severity questionnaire validation study.**

| <b>Treatment</b>                   | <b>Past<br/>(N=117)</b> | <b>Current<br/>(N=117)</b> |
|------------------------------------|-------------------------|----------------------------|
| Oral antibiotics                   | 57 (48.7%)              | 55 (47.0%)                 |
| Topical antibiotics                | 49 (41.9%)              | 27 (23.1%)                 |
| Isotretinoin (oral medication)     | 42 (35.9%)              | 19 (16.2%)                 |
| Surgery                            | 39 (33.3%)              | 16 (13.7%)                 |
| Oral contraceptive pill            | 17 (14.5%)              | 16 (13.7%)                 |
| Other oral medication or injection | 14 (12.0%)              | 14 (12.0%)                 |
| Adalimumab                         | 8 (6.8%)                | 12 (10.3%)                 |
| Clinical trial of a biologic       | 7 (6.0%)                | 5 (4.3%)                   |
| Acitretin (oral medication)        | 3 (2.6%)                | 4 (3.4%)                   |
| Infliximab                         | 2 (1.7%)                | 2 (1.7%)                   |
| Etanercept                         | 0 (0.0%)                | 1 (0.8%)                   |
| Ustekinumab                        | 0 (0.0%)                | 0 (0.0%)                   |
