# Supplementary material for: Hidradenitis Suppurativa (HS) prevalence, demographics and management pathways in Australia: A population-based cross-sectional study
Source: PubMed Central journal article supplement (PMC6057625; doi:10.1371/journal.pone.0200683), 2018-07-24
Supplement: pone.0200683.s004.pdf [file pone.0200683.s004.pdf]

## S4 Table. Summary of HS Severity Questionnaire Results.

|                                                                                                                                                                  | All Enrolled Population<br>(N=117) |
|------------------------------------------------------------------------------------------------------------------------------------------------------------------|------------------------------------|
| Q1. In the last 6 months, how many sore or painful boils/lumps at least 1 cm (or half an inch) in diameter have you had?                                         |                                    |
| 0                                                                                                                                                                | 6 (5.13%)                          |
| 1                                                                                                                                                                | 8 (6.84%)                          |
| 2-3                                                                                                                                                              | 31 (26.50%)                        |
| 4-6                                                                                                                                                              | 27 (23.08%)                        |
| > 6                                                                                                                                                              | 43 (36.75%)                        |
| Q2. In the last 6 months what is the most pain you have experienced from your boils or lumps (0 is no pain and 10 is unbearable pain)?                           |                                    |
| n                                                                                                                                                                | 116                                |
| Mean (SD)                                                                                                                                                        | 6.60 (2.78)                        |
| SE                                                                                                                                                               | 0.26                               |
| Median                                                                                                                                                           | 8.00                               |
| Min, Max                                                                                                                                                         | 0.0, 10.0                          |
| 0                                                                                                                                                                | 5 (4.27%)                          |
| 1                                                                                                                                                                | 4 (3.42%)                          |
| 2                                                                                                                                                                | 1 (0.85%)                          |
| 3                                                                                                                                                                | 9 (7.69%)                          |
| 4                                                                                                                                                                | 8 (6.84%)                          |
| 5                                                                                                                                                                | 9 (7.69%)                          |
| 6                                                                                                                                                                | 11 (9.40%)                         |
| 7                                                                                                                                                                | 8 (6.84%)                          |
| 8                                                                                                                                                                | 30 (25.64%)                        |
| 9                                                                                                                                                                | 16 (13.68%)                        |
| 10                                                                                                                                                               | 15 (12.82%)                        |
| Q3. Have you ever had boils or lumps heal leaving scars that feel harder than the skin around the scars? (at any stage in your life, not just the last 6 months) |                                    |
| Yes                                                                                                                                                              | 102 (87.18%)                       |
| No                                                                                                                                                               | 15 (12.82%)                        |
| Q4. In the last 6 months, have the boils or scars:                                                                                                               |                                    |
| (a) Restricted your movements                                                                                                                                    |                                    |
| Yes                                                                                                                                                              | 97 (82.91%)                        |
| No                                                                                                                                                               | 19 (16.24%)                        |
| (b) Interfered with your work/school activities?                                                                                                                 |                                    |
| Yes                                                                                                                                                              | 76 (64.96%)                        |
| No                                                                                                                                                               | 39 (33.33%)                        |
| (c) Caused you embarrassment or shame?                                                                                                                           |                                    |
| Yes                                                                                                                                                              | 93 (79.49%)                        |
| No                                                                                                                                                               | 23 (19.66%)                        |
| (d) Impacted on personal or physical relationships?                                                                                                              |                                    |
| Yes                                                                                                                                                              | 77 (65.81%)                        |
| No                                                                                                                                                               | 39 (33.33%)                        |

|                                                                                                     | All Enrolled Population<br>(N=117) |
|-----------------------------------------------------------------------------------------------------|------------------------------------|
| Q5. Does the skin of the area affected ever heal completely (possibly leaving scars)?               |                                    |
| Yes                                                                                                 | 56 (47.86%)                        |
| No                                                                                                  | 60 (51.28%)                        |
| Q6. Does the area affected by scarring ever feel "lumpy" or the contour of "bubble wrap"?           |                                    |
| Yes                                                                                                 | 101 (86.32%)                       |
| No                                                                                                  | 16 (13.68%)                        |
| Q7. How big is the area currently affected by scarring that you would regard as ugly/distressing?   |                                    |
| Surface area of 3 hands or larger                                                                   | 39 (33.33%)                        |
| Surface area of less than 3 hands but more than 2 hands                                             | 13 (11.11%)                        |
| Surface area of 2 hands or less                                                                     | 65 (55.56%)                        |
| Q8. Does the area currently affected always contain some painful pus-filled boils, lumps and scars? |                                    |
| Yes                                                                                                 | 95 (81.20%)                        |
| No                                                                                                  | 22 (18.80%)                        |
