# Supplementary material for: Hidradenitis Suppurativa (HS) prevalence, demographics and management pathways in Australia: A population-based cross-sectional study
Source: PubMed Central journal article supplement (PMC6057625; doi:10.1371/journal.pone.0200683), 2018-07-24
Supplement: pone.0200683.s005.pdf [file pone.0200683.s005.pdf]

**S5 Table. Clinicians consulted by diagnosed and undiagnosed individuals suspected of having HS <sup>a</sup>.**

| Have you been diagnosed with Hidradenitis Suppurativa or Acne Inversa?                   |                               |             |                                                                                                         |                               |               |
|------------------------------------------------------------------------------------------|-------------------------------|-------------|---------------------------------------------------------------------------------------------------------|-------------------------------|---------------|
| Yes<br>6/88 (6.8%)                                                                       |                               |             | No<br>82/88 (93.2%)                                                                                     |                               |               |
| From which clinician did you receive your diagnosis?                                     | General practitioner          | 2/6 (33.3%) | How many clinicians have you seen regarding your condition of boils?                                    | 21/82 (25.6%)                 |               |
|                                                                                          | Dermatologist                 | 3/6 (50.0%) | 1                                                                                                       | 28/82 (34.1%)                 |               |
|                                                                                          | Surgeon                       | 0           | 2                                                                                                       | 13/82 (15.9%)                 |               |
|                                                                                          | Infectious disease specialist | 1/6 (16.7%) | 3                                                                                                       | 4/82 (4.9%)                   |               |
|                                                                                          | Gynaecologist                 | 0           | 4                                                                                                       | 3/82 (3.7%)                   |               |
|                                                                                          | Emergency specialist          | 0           | 5                                                                                                       | 3/82 (3.7%)                   |               |
|                                                                                          | Gastroenterologist            | 0           | More than 5                                                                                             | 10/82 (12.2%)                 |               |
|                                                                                          | Other                         | 0           | None                                                                                                    |                               |               |
| How many clinicians did you see before you received your diagnosis?                      | 1                             | 0           | Which clinician/s have you seen regarding your condition of boils (tick all that apply)? <sup>b,c</sup> | General practitioner          | 59/61 (96.7%) |
|                                                                                          | 2                             | 2/6 (33.3%) |                                                                                                         | Dermatologist                 | 12/61 (19.7%) |
|                                                                                          | 3                             | 2/6 (33.3%) |                                                                                                         | Surgeon                       | 7/61 (11.5%)  |
|                                                                                          | 4                             | 0           |                                                                                                         | Infectious disease specialist | 5/61 (8.2%)   |
|                                                                                          | 5                             | 0           |                                                                                                         | Gynaecologist                 | 2/61 (3.3%)   |
|                                                                                          | More than 5                   | 1/6 (16.7%) |                                                                                                         | Emergency specialist          | 3/61 (4.9%)   |
|                                                                                          |                               | 1/6 (16.7%) |                                                                                                         | Gastroenterologist            | 1/61 (1.6%)   |
| Which clinicians did you see prior to your diagnosis (tick all that apply)? <sup>c</sup> | General practitioner          | 4/6 (66.7%) | Which clinicians do you currently see regarding your condition of boils? <sup>b,c</sup>                 | General practitioner          | 44/61 (72.1%) |
|                                                                                          | Dermatologist                 | 1/6 (16.7%) |                                                                                                         | Dermatologist                 | 0             |
|                                                                                          | Surgeon                       | 0           |                                                                                                         | Surgeon                       | 2/61 (3.3%)   |
|                                                                                          | Infectious disease specialist | 2/6 (33.3%) |                                                                                                         | Infectious disease specialist | 2/61 (3.3%)   |
|                                                                                          | Gynaecologist                 | 0           |                                                                                                         | Gynaecologist                 | 1/61 (1.6%)   |
|                                                                                          | Emergency specialist          | 1/6 (16.7%) |                                                                                                         | Emergency specialist          | 0             |
|                                                                                          | Gastroenterologist            | 0           |                                                                                                         | Gastroenterologist            | 0             |
|                                                                                          | Other                         | 6/6 (100%)  |                                                                                                         | Other                         | 2/61 (3.3%)   |
|                                                                                          |                               | None        | 15/61 (24.6%)                                                                                           |                               |               |

a Individuals suspected of having HS (N=88) based on the results of the HS screening questionnaire (Table S1)

b With at least one clinician seen regarding the condition of boils.

c A subject can have answered more than one clinician
