# Supplementary material for: Hidradenitis Suppurativa (HS) prevalence, demographics and management pathways in Australia: A population-based cross-sectional study
Source: PubMed Central journal article supplement (PMC6057625; doi:10.1371/journal.pone.0200683), 2018-07-24
Supplement: pone.0200683.s006.pdf [file pone.0200683.s006.pdf]

**S6 Table. Patients' disposition for Stage 2 (clinical assessment) of the HS Epidemiology study**

| <b>Patients' disposition</b>                                                                                    | <b>Suspected HS<br/>(N = 88)</b> |
|-----------------------------------------------------------------------------------------------------------------|----------------------------------|
| Did not consent to sharing their contact information                                                            | 49/88 (55.7%)                    |
| Incorrect details provided                                                                                      | 1/88 (1.1%)                      |
| Did not agree to attend dermatology consult                                                                     | 15/88 (17.0%)                    |
| Did not attend dermatology consult once appointment was scheduled.<br>Attempts to reschedule were unsuccessful. | 11/88 (12.5%)                    |
| Attended dermatology clinic as scheduled (evaluable)                                                            | 12/88 (13.6%)                    |
