# Supplementary material for: Hidradenitis Suppurativa (HS) prevalence, demographics and management pathways in Australia: A population-based cross-sectional study
Source: PubMed Central journal article supplement (PMC6057625; doi:10.1371/journal.pone.0200683), 2018-07-24
Supplement: pone.0200683.s007.pdf [file pone.0200683.s007.pdf]

**S7 Table. Demographic characteristics of suspected HS individuals <sup>a</sup>: Attended vs not attended clinic**

|                         |                                                | Attended<br>(N=12) | Not attended<br>(N=76) | Total<br>(N=88) | P-value |
|-------------------------|------------------------------------------------|--------------------|------------------------|-----------------|---------|
| Gender                  | Male                                           | 6/12 (50.0%)       | 24/76 (31.6%)          | 30/88 (34.1%)   | 0.2109  |
|                         | Female                                         | 6/12 (50.0%)       | 52/76 (68.4%)          | 58/88 (65.9%)   |         |
| Age category            | 18-24 years                                    | 0                  | 6/76 (7.9%)            | 6/88 (6.8%)     | 0.3812  |
|                         | 25-34 years                                    | 2/12 (16.7%)       | 13/76 (17.1%)          | 15/88 (17.0%)   |         |
|                         | 35-44 years                                    | 4/12 (33.3%)       | 25/76 (32.9%)          | 29/88 (33.0%)   |         |
|                         | 45-54 years                                    | 2/12 (16.7%)       | 17/76 (22.4%)          | 19/88 (21.6%)   |         |
|                         | 55-64 years                                    | 4/12 (33.3%)       | 9/76 (11.8%)           | 13/88 (14.8%)   |         |
|                         | 65 years & over                                | 0                  | 6/76 (7.9%)            | 6/88 (6.8%)     |         |
| Country of Birth        | Australia                                      | 10/12 (83.3%)      | 66/76 (86.8%)          | 76/88 (86.4%)   | 0.7420  |
|                         | Other                                          | 2/12 (16.7%)       | 10/76 (13.2%)          | 12/88 (13.6%)   |         |
| Household location      | VIC                                            | 5/12 (41.7%)       | 21/76 (27.6%)          | 26/88 (29.5%)   | 0.2890  |
|                         | NSW/ACT                                        | 5/12 (41.7%)       | 19/76 (25.0%)          | 24/88 (27.3%)   |         |
|                         | QLD                                            | 0                  | 14/76 (18.4%)          | 14/88 (15.9%)   |         |
|                         | SA                                             | 0                  | 11/76 (14.5%)          | 11/88 (12.5%)   |         |
|                         | WA                                             | 1/12 (8.3%)        | 8/76 (10.5%)           | 9/88 (10.2%)    |         |
|                         | NT/TAS                                         | 1/12 (8.3%)        | 3/76 (3.9%)            | 4/88 (4.5%)     |         |
| Smoker                  | No                                             | 7/12 (58.3%)       | 33/76 (43.4%)          | 40/88 (45.5%)   | 0.3350  |
|                         | Yes                                            | 5/12 (41.7%)       | 43/76 (56.6%)          | 48/88 (54.5%)   |         |
| Highest education level | High-school                                    | 3/12 (25.0%)       | 40/76 (52.6%)          | 43/88 (48.9%)   | 0.0752  |
|                         | University                                     | 9/12 (75.0%)       | 36/76 (47.4%)          | 45/88 (51.1%)   |         |
| Personal Annual Income  | Less than 20K (AUD)                            | 2/12 (16.7%)       | 19/76 (25.0%)          | 21/88 (23.9%)   | 0.0321  |
|                         | 20K-<40K (AUD)                                 | 3/12 (25.0%)       | 32/76 (42.1%)          | 35/88 (39.8%)   |         |
|                         | 40K-<80K (AUD)                                 | 3/12 (25.0%)       | 20/76 (26.3%)          | 23/88 (26.1%)   |         |
|                         | 80K(AUD) or more                               | 4/12 (33.3%)       | 5/76 (6.6%)            | 9/88 (10.2%)    |         |
| Employment status       | Employed                                       | 6/12 (50.0%)       | 34/76 (44.7%)          | 40/88 (45.5%)   | 0.4689  |
|                         | Unemployed                                     | 4/12 (33.3%)       | 14/76 (18.4%)          | 18/88 (20.5%)   |         |
|                         | Retired                                        | 2/12 (16.7%)       | 13/76 (17.1%)          | 15/88 (17.0%)   |         |
|                         | Student                                        | 0                  | 2/76 (2.6%)            | 2/88 (2.3%)     |         |
|                         | Home duties                                    | 0                  | 13/76 (17.1%)          | 13/88 (14.8%)   |         |
| Occupation              | Professional/Semi-pro/Sales                    | 2/6 (33.3%)        | 9/34 (26.5%)           | 11/40 (27.5%)   | 0.3556  |
|                         | Executive/White collar                         | 4/6 (66.7%)        | 16/34 (47.1%)          | 20/40 (50.0%)   |         |
|                         | Skilled/Semi-skilled                           | 0                  | 9/34 (26.5%)           | 9/40 (22.5%)    |         |
|                         | Unskilled/Farm owner/worker                    | 0                  | 0                      | 0               |         |
|                         | Unclassified                                   | 0                  | 0                      | 0               |         |
| Marital status          | Married/De Facto                               | 5/12 (41.7%)       | 41/76 (53.9%)          | 46/88 (52.3%)   | 0.7311  |
|                         | Single/Separated/Engaged/<br>Planning to marry | 5/12 (41.7%)       | 25/76 (32.9%)          | 30/88 (34.1%)   |         |
|                         | Widowed/Divorced                               | 2/12 (16.7%)       | 10/76 (13.2%)          | 12/88 (13.6%)   |         |
|                         |                                                |                    |                        |                 |         |
| BMI category            | Underweight                                    | 0                  | 0                      | 0               | 0.2695  |
|                         | Acceptable weight                              | 2/7 (28.6%)        | 3/23 (13.0%)           | 5/30 (16.7%)    |         |
|                         | Overweight                                     | 3/7 (42.9%)        | 4/23 (17.4%)           | 7/30 (23.3%)    |         |
|                         | Obese                                          | 2/7 (28.6%)        | 14/23 (60.9%)          | 16/30 (53.3%)   |         |
|                         | Unclassified                                   | 0                  | 2/23 (8.7%)            | 2/30 (6.7%)     |         |

<sup>a</sup> Individuals suspected of having HS (N=88) based on the results of the HS screening questionnaire (Table S1).
